# Supplementary material
Source: publisher site journal article supplement (https://www.dovepress.com/get_supplementary_file.php?f=272895.docx)

**Supplementary material**

Figure S1: The expression levels of lncRNA EWSAT1 in CRC tumor samples (N = 275) and corresponding non-tumor samples (N = 41) were analyzed from TCGA databases. T, tumor samples; N, non-tumor samples. *P<0.05.


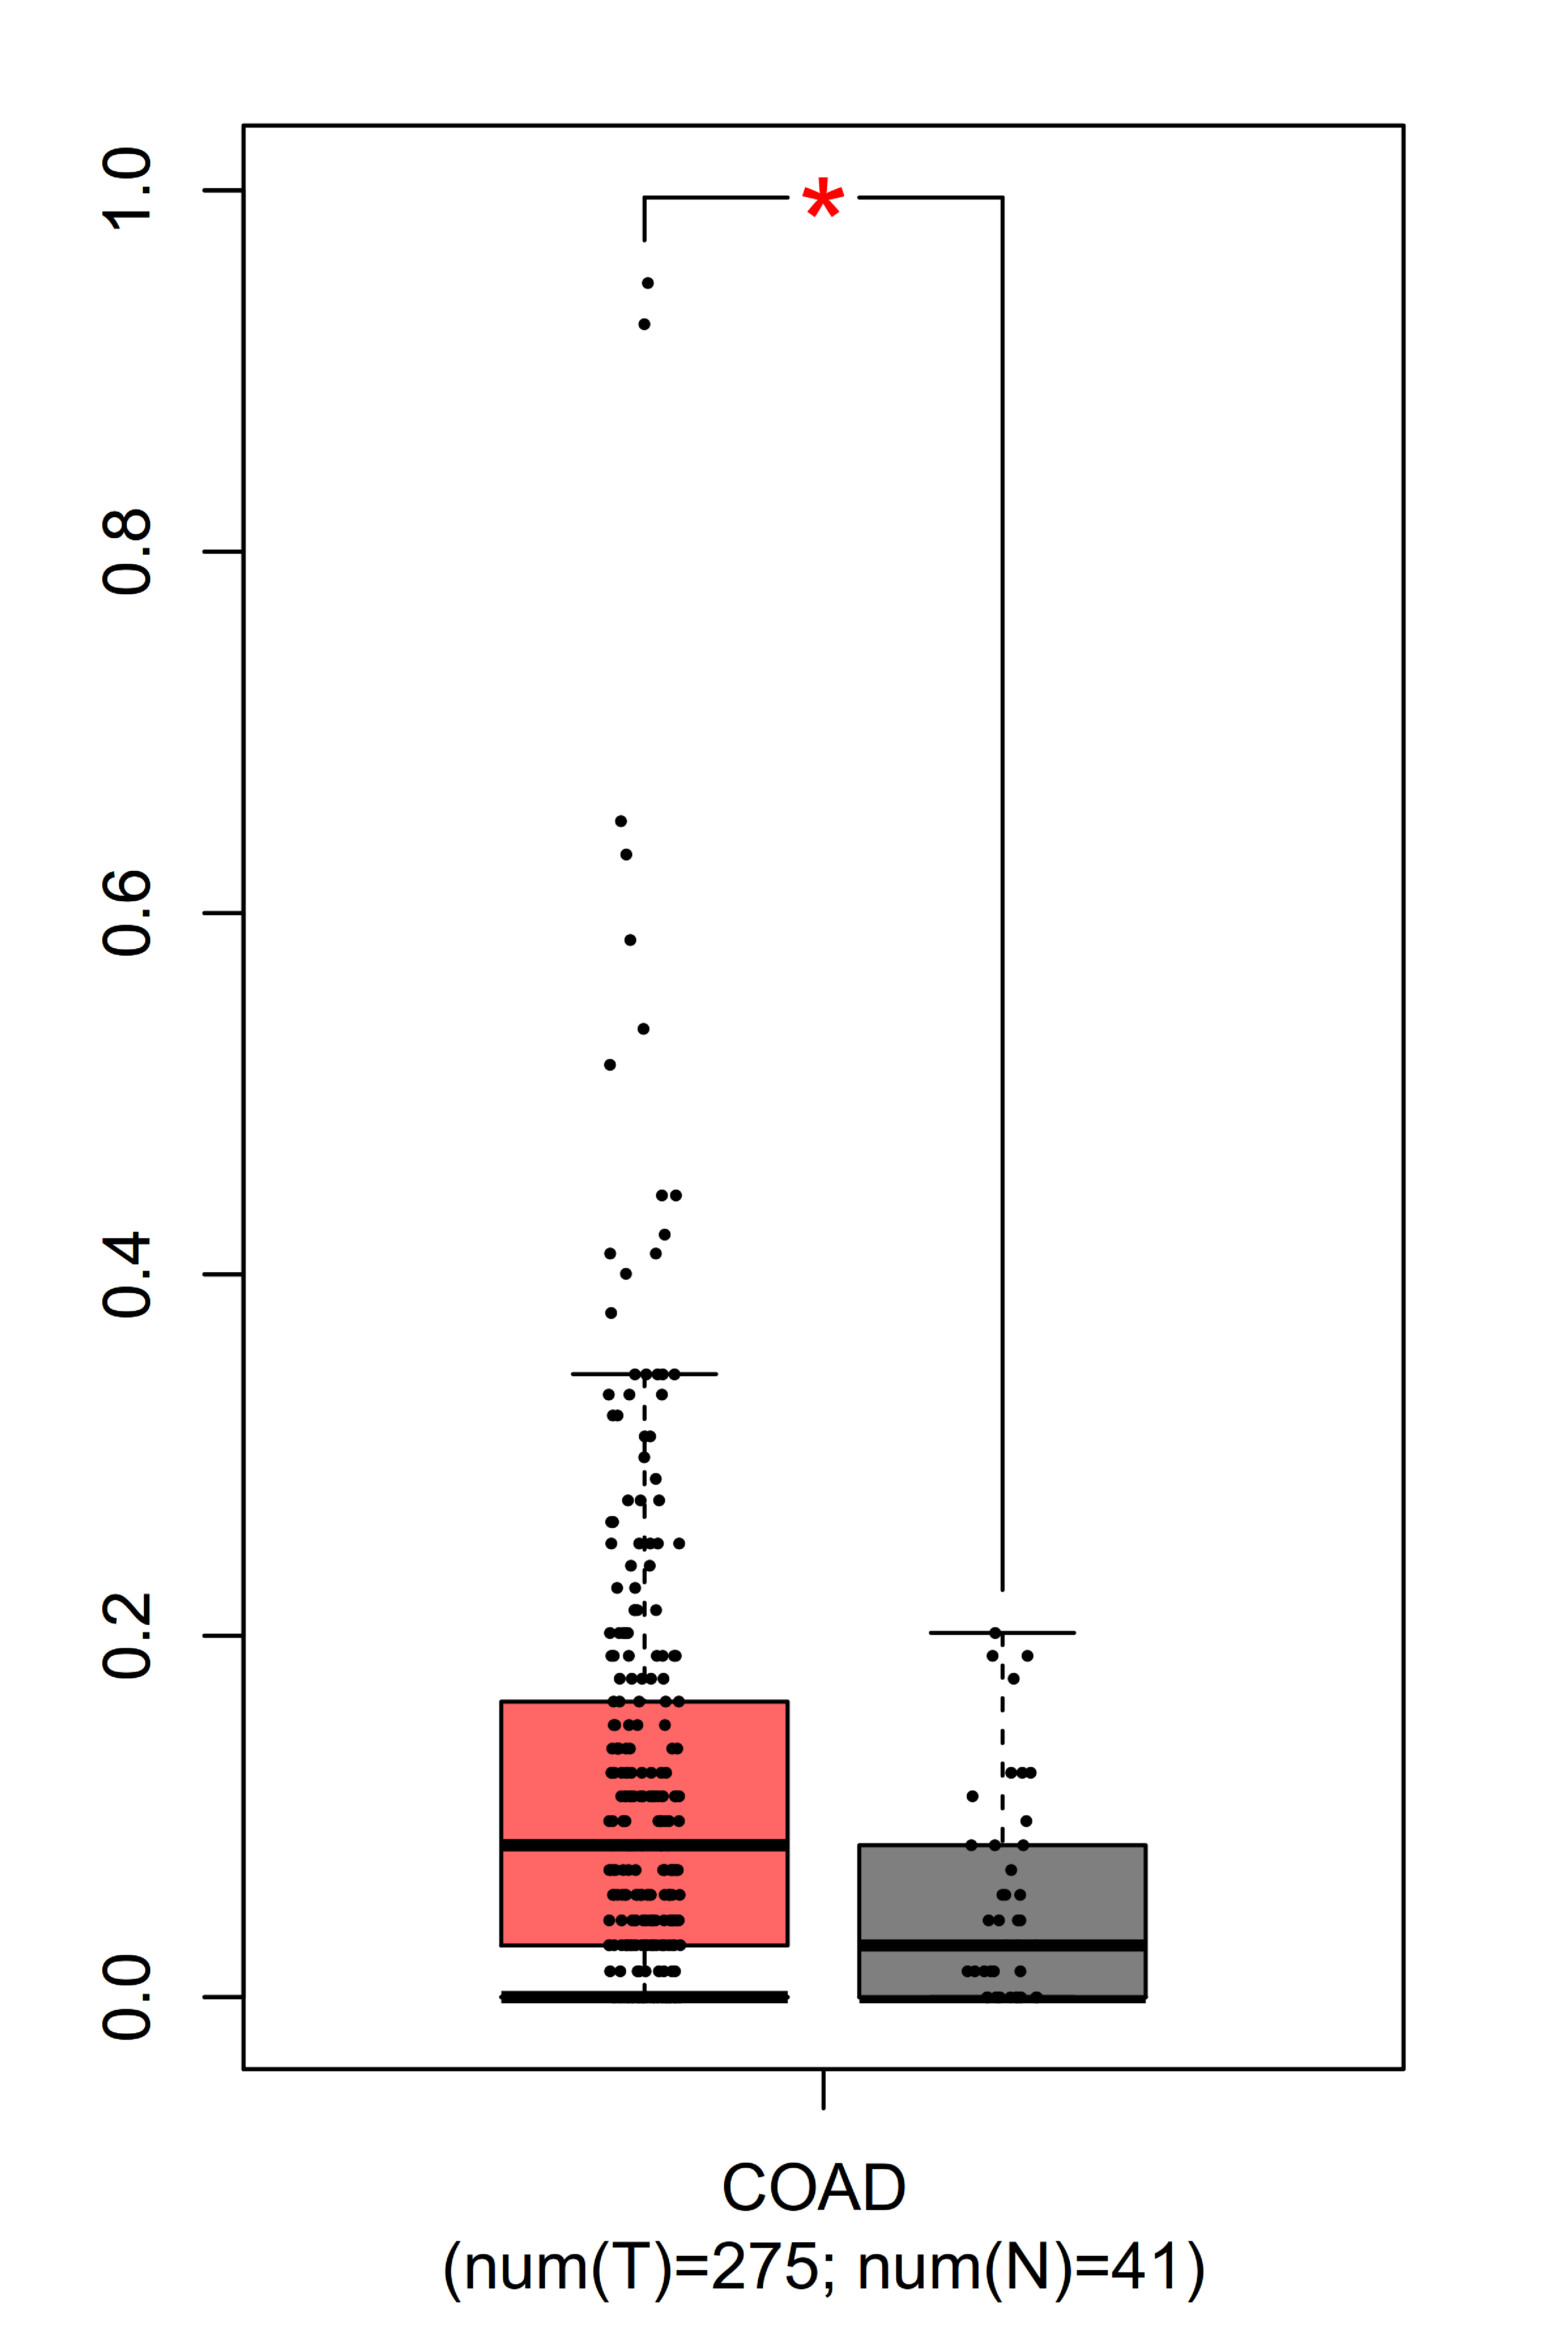

Supplement: Supplementary file 1 [file get_supplementary_file.php]
